# Supplementary material for: Probiotics suppress LL37 generated rosacea-like skin inflammation by modulating the TLR2/MyD88/NF-κB signaling pathway
Source: Royal Society of Chemistry journal article supplement (doi:10.1039/d4fo03083d), 2024-01-01
Supplement: d4fo03083d5.pdf [file d4fo03083d5.pdf]

Table S1

| qPCR target | Forward 5'-3'          | Reverse 5'-3'         |
|-------------|------------------------|-----------------------|
| CCL5        | GCTGCTTTGCCTACCTCTCC   | TCGAGTGACAAACACGACTGC |
| CXCL9       | AACCTCCCACGTAGCTTTTCG  | GCCAATGCCTGGTGTGTAAC  |
| CXCL10      | CCAAGTGCTGCCGTCAATTTTC | GGCTCGCAGGGATGATTTCAA |
| Gapdh       | CTCGTGGAGTCTACTGGTGT   | GTCATCATACTGGCAGGTT   |

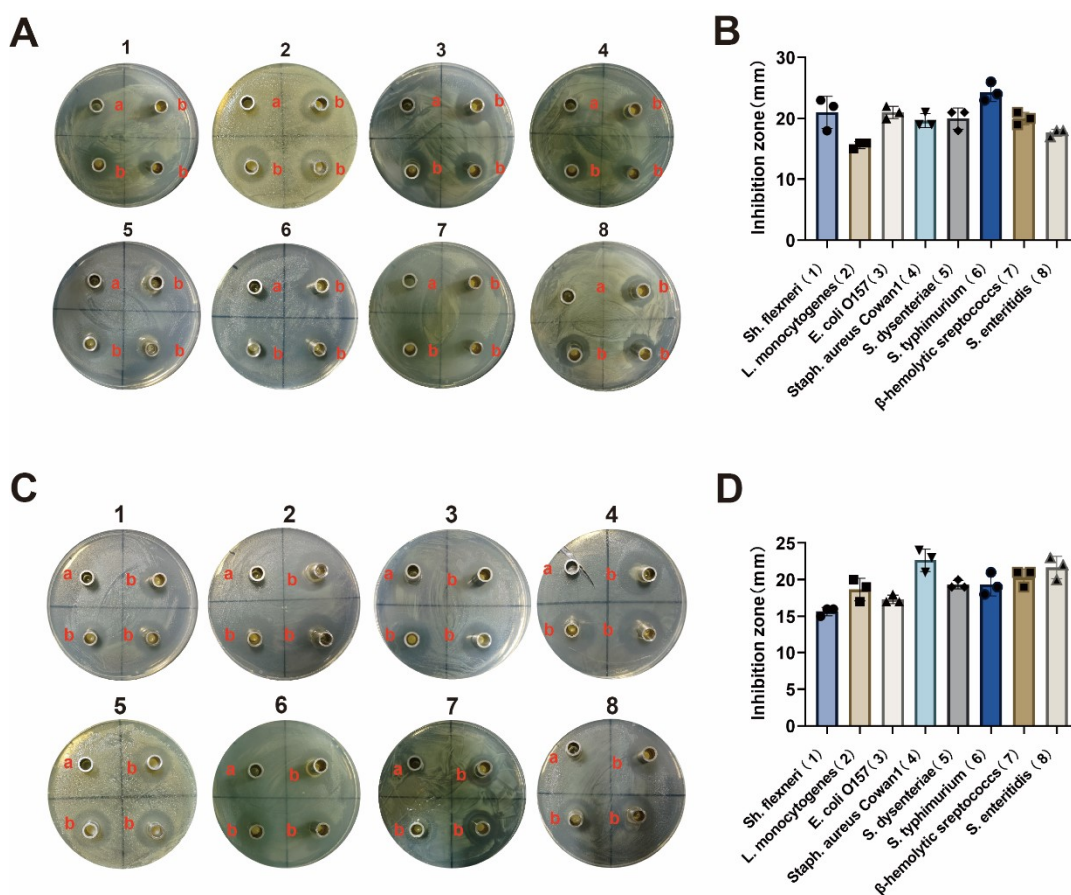

**Fig. S1** Evaluation of the probiotic properties of *L. salivarius* 23-006 and *L. paracasei* 23-008 postbiotics. **A** Oxford cup method for determining the bacteriostatic properties of *L. salivarius* 23-006 postbiotics; a: the negative control; b: *L. salivarius* 23-006 postbiotics. **B** Oxford cup method for determining the bacteriostatic properties of *L. paracasei* 23-008 postbiotics; a: the negative control; b: *L. paracasei* 23-008 postbiotics.

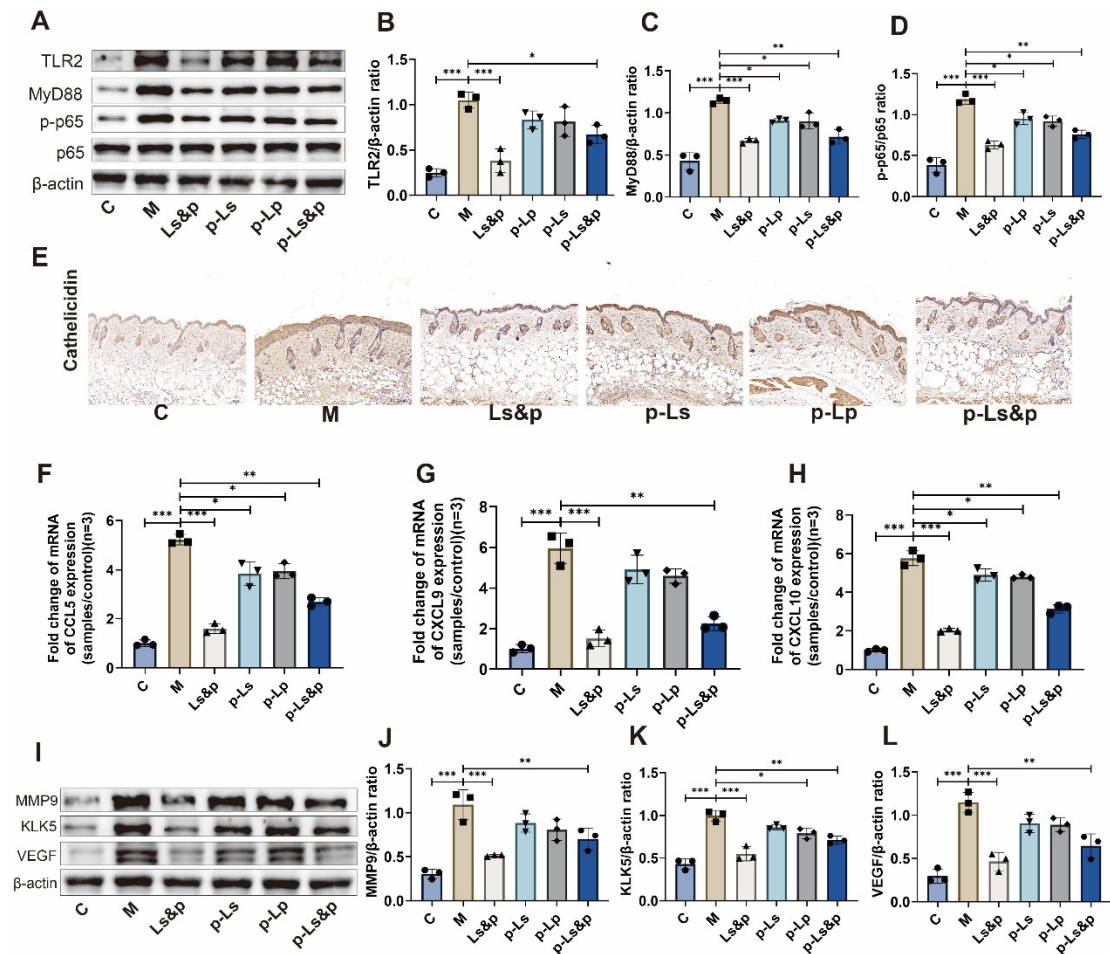

**Fig. S2** *L. salivarius* 23-006 and *L. paracasei* 23-008 postbiotics inhibited rosacea inflammatory responses through the TLR2/MyD88/NF- $\kappa$ B pathway. **A-D** Western blot analysis for TLR2/MyD88/NF- $\kappa$ B pathway expression in mouse dorsal lesions. **E** Immunohistochemistry of cathelicidin in mouse dorsal lesions (Scale bar: 100  $\mu$ m). **F-H** RT-qPCR for chemokines CCL5, CXCL9, CXCL10 in mouse dorsal lesions. **I-L** Western blot analysis for MMP9, KLK5, VEGF protein expression in mouse skin lesions. C: control group (n = 3); M: model group (n = 3); Ls&p: combined oral *L. salivarius* 23-006 and *L. paracasei* 23-008 group (n = 3); p-Ls: oral *L. salivarius* 23-006 postbiotics group (n = 3); p-Lp: oral *L. paracasei* 23-008 postbiotics group (n = 3); p-Ls&p: combined oral *L. salivarius* 23-006 and *L. paracasei* 23-008 postbiotics group (n = 3). Data was presented as mean  $\pm$  SD. Statistical significance was analyzed by ANOVA: \*  $p < 0.05$ , \*\*  $p < 0.01$ , \*\*\*  $p < 0.001$ .

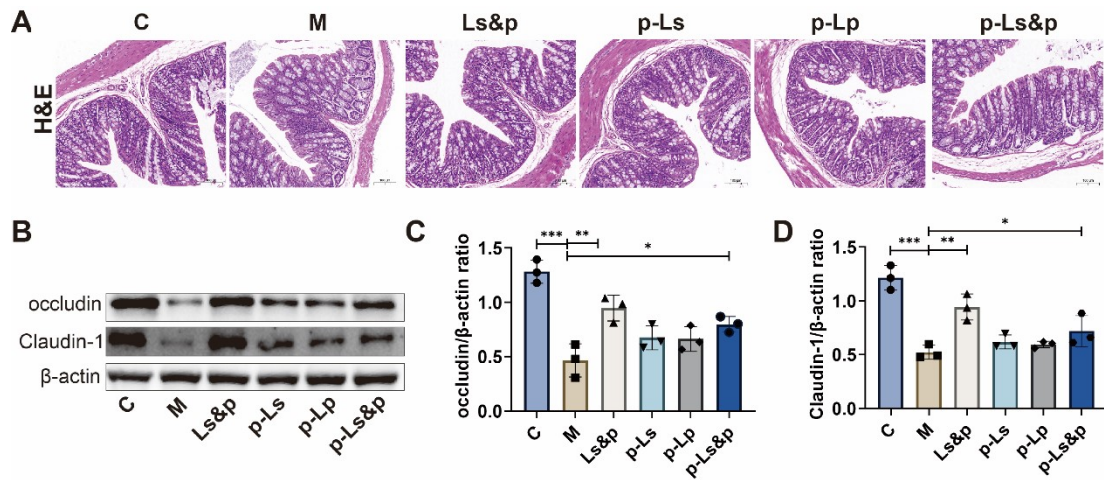

**Fig. S3** *L. salivarius* 23-006 and *L. paracasei* 23-008 postbiotics attenuated LL37-induced intestinal inflammation and enhanced intestinal barrier. **A** H&E staining of intestinal tissue (scale bar: 100  $\mu$ m). **B-D** Western blot analysis for occludin and Claudin-1 protein expression in mouse intestinal tissue. C: control group (n = 3); M: model group (n = 3); Ls&p: combined oral *L. salivarius* 23-006 and *L. paracasei* 23-008 group (n = 3); p-Ls: oral *L. salivarius* 23-006 postbiotics group (n = 3); p-Lp: oral *L. paracasei* 23-008 postbiotics group (n = 3); p-Ls&p: combined oral *L. salivarius* 23-006 and *L. paracasei* 23-008 postbiotics group (n = 3). Data was presented as mean  $\pm$  SD. Statistical significance was analyzed by ANOVA: \*  $p < 0.05$ , \*\*  $p < 0.01$ , \*\*\*  $p < 0.001$ .
