# Supplementary figures and images for: Probiotics suppress LL37 generated rosacea-like skin inflammation by modulating the TLR2/MyD88/NF-κB signaling pathway
Source: Royal Society of Chemistry journal article supplement (doi:10.1039/d4fo03083d), 2024-01-01

**A**

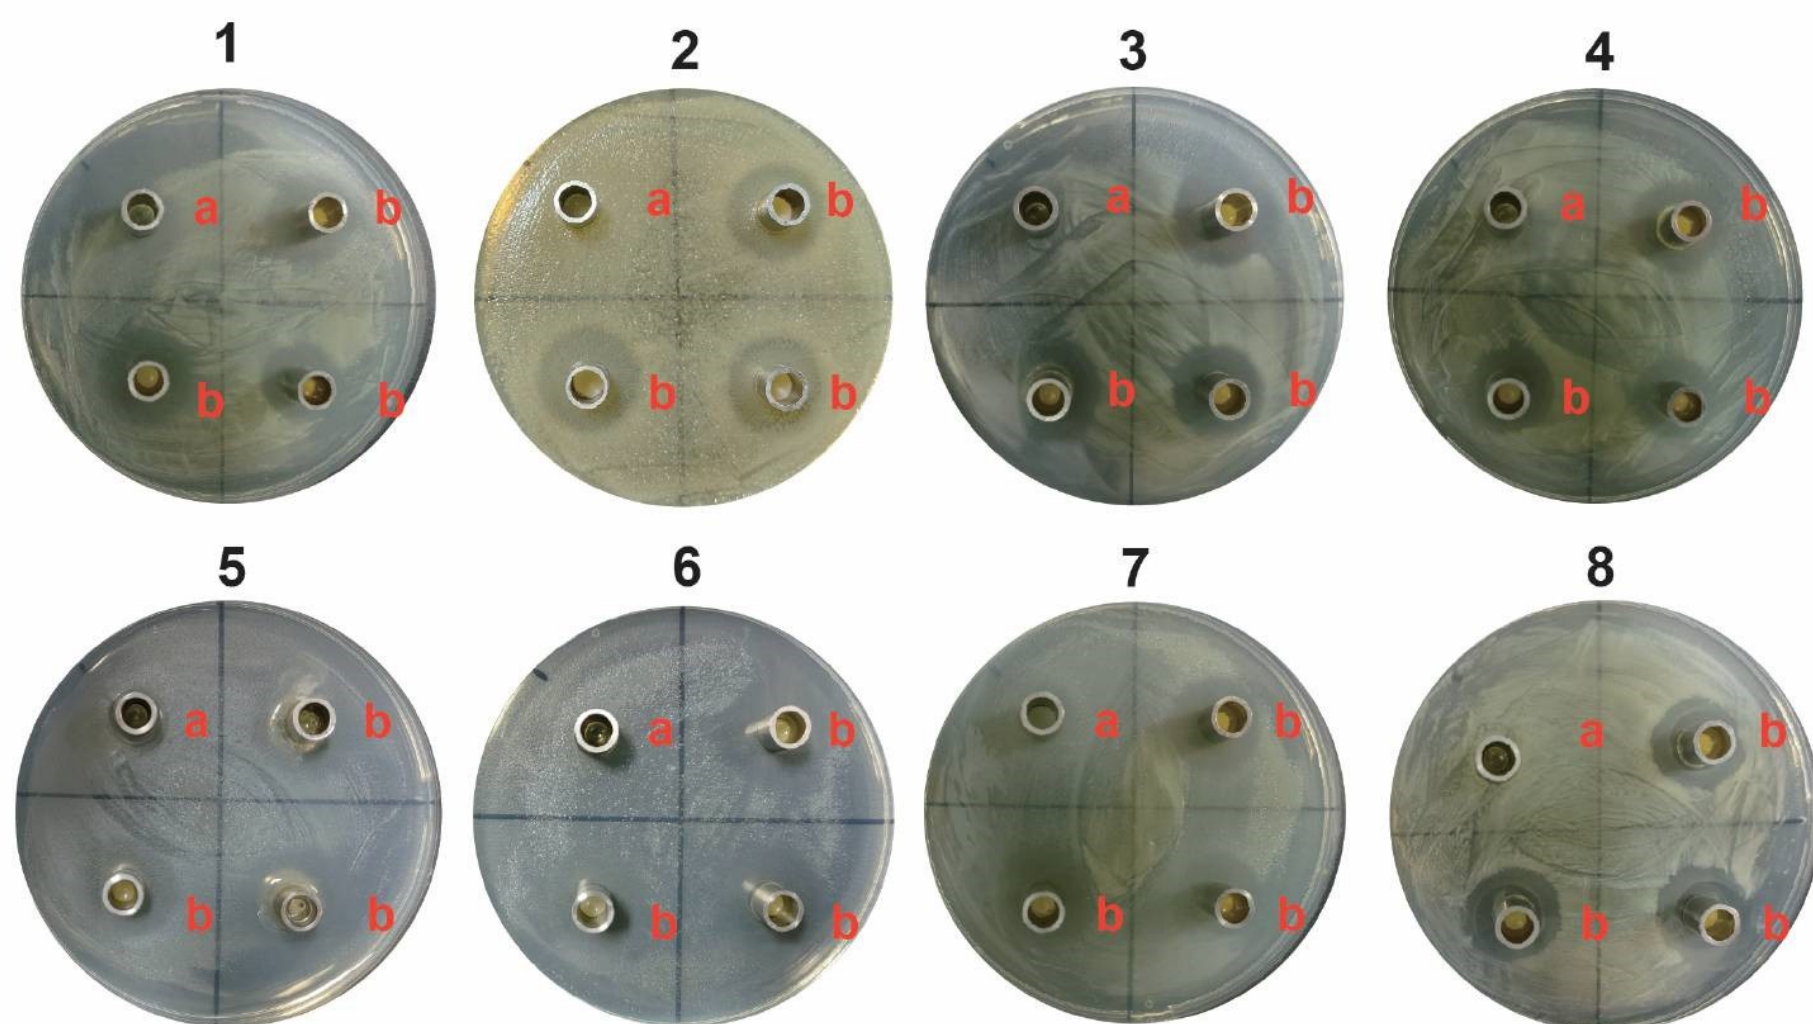

**B**

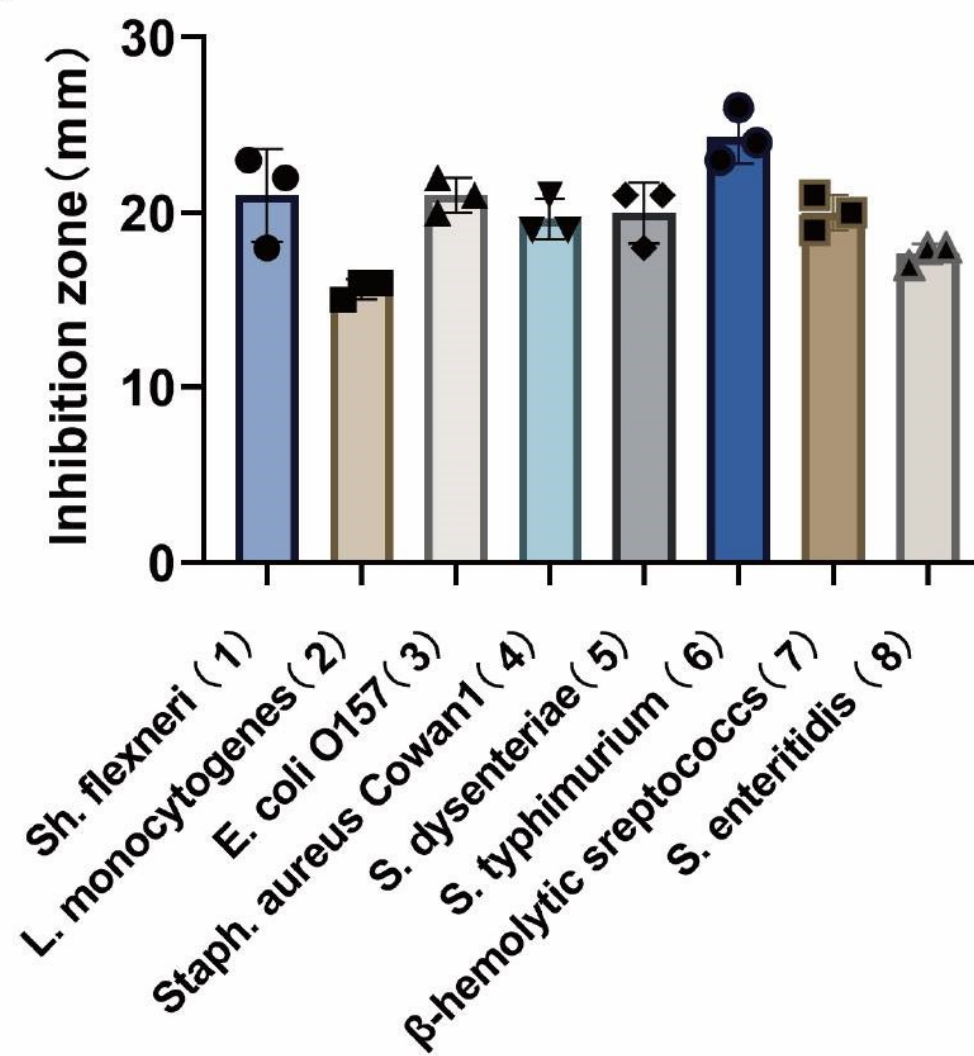

**C**

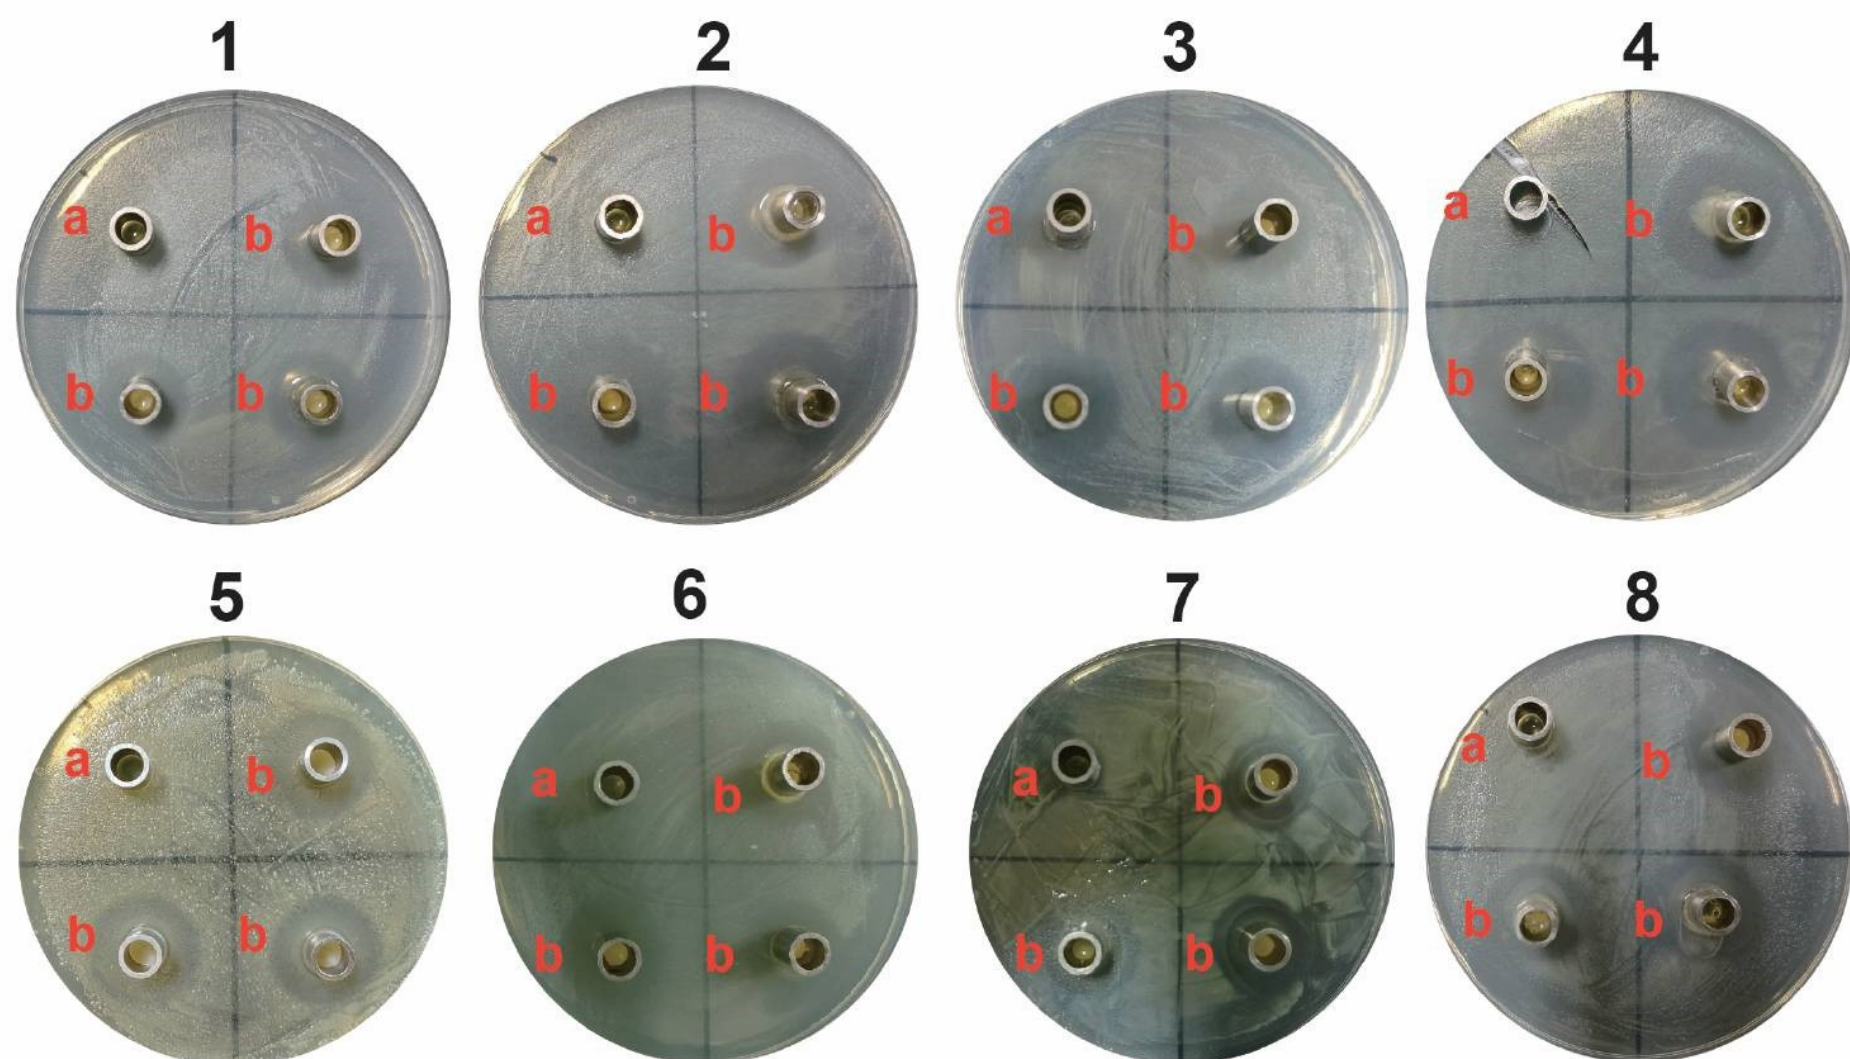

**D**

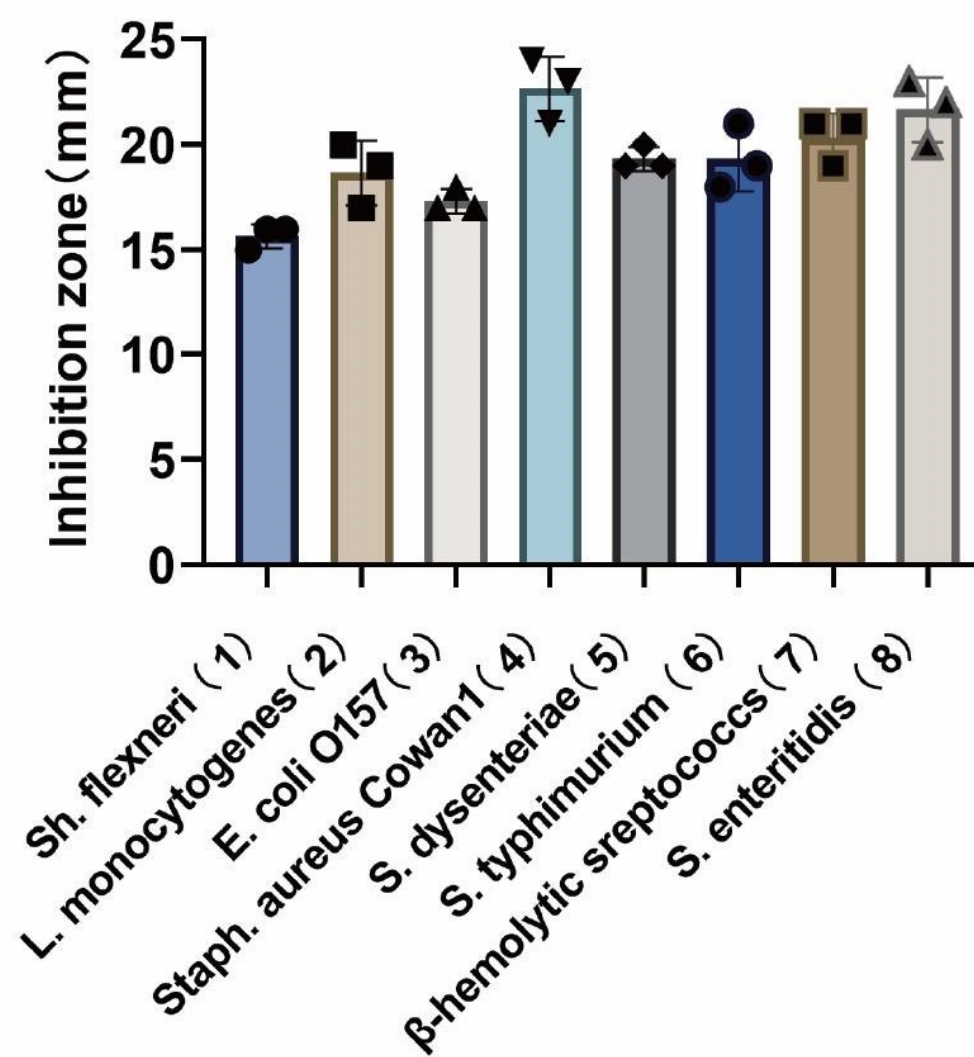

Supplement: d4fo03083d2.pdf [file d4fo03083d2.pdf]

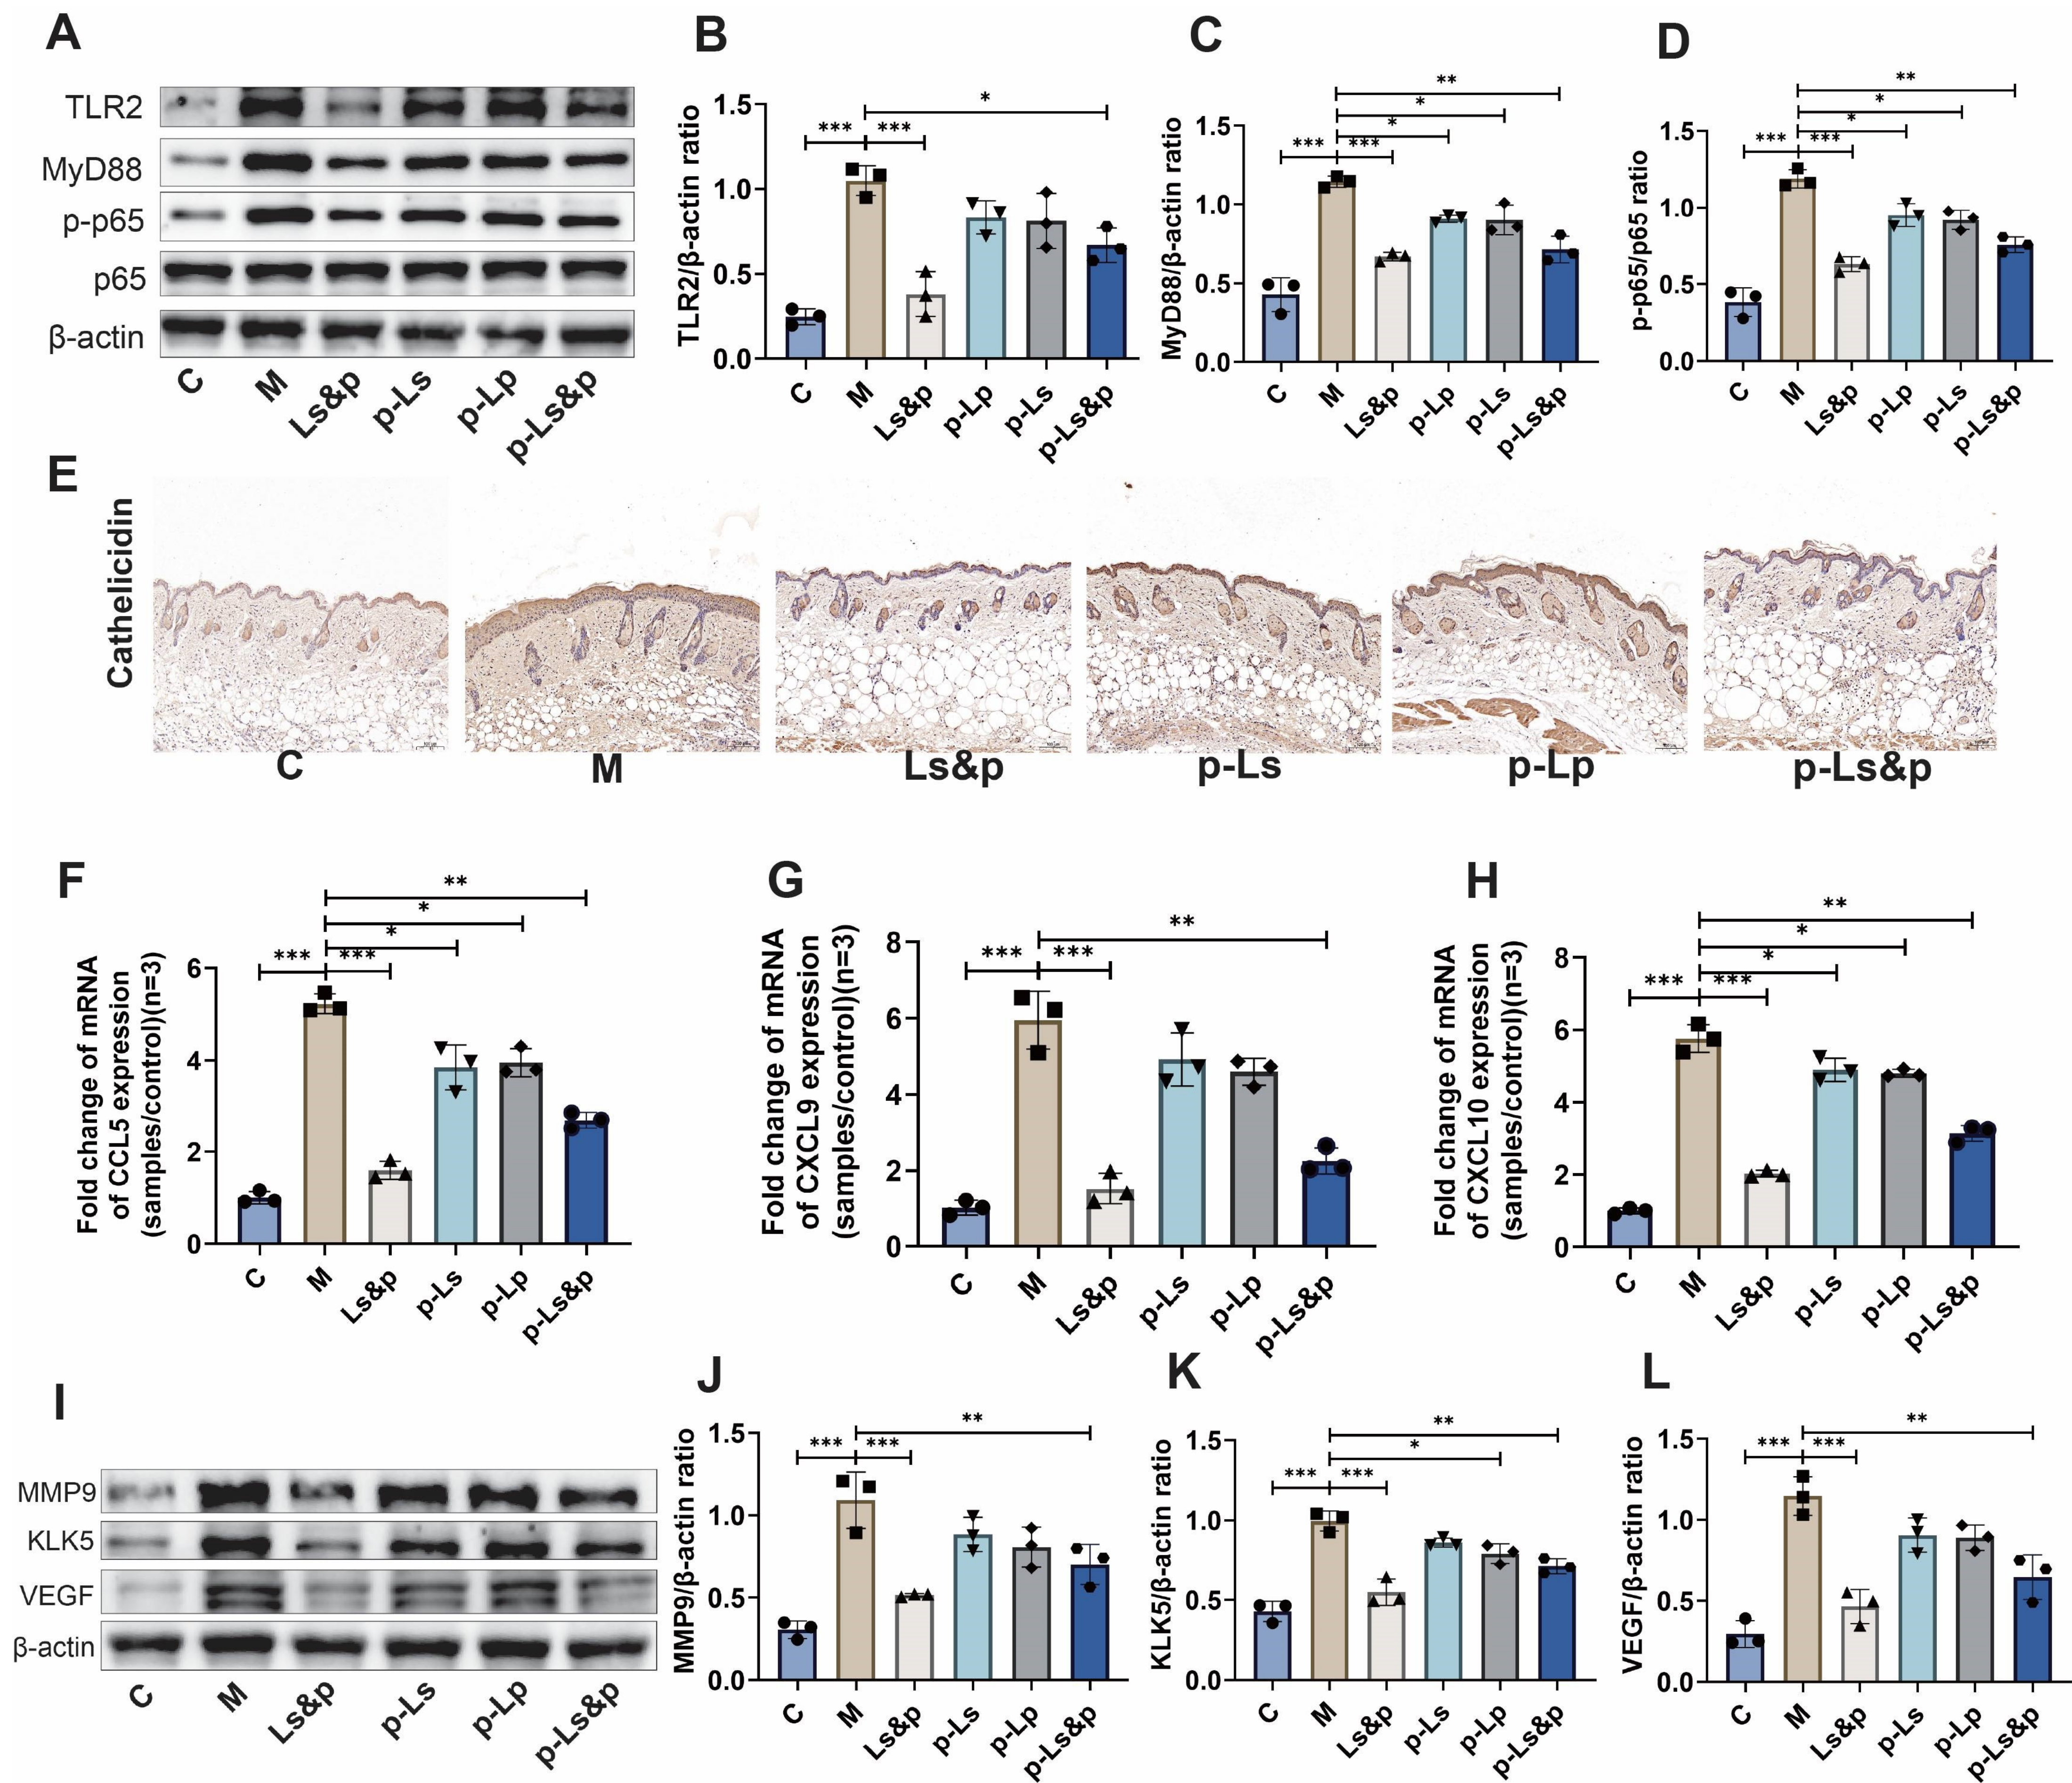

Supplement: d4fo03083d3.pdf [file d4fo03083d3.pdf]

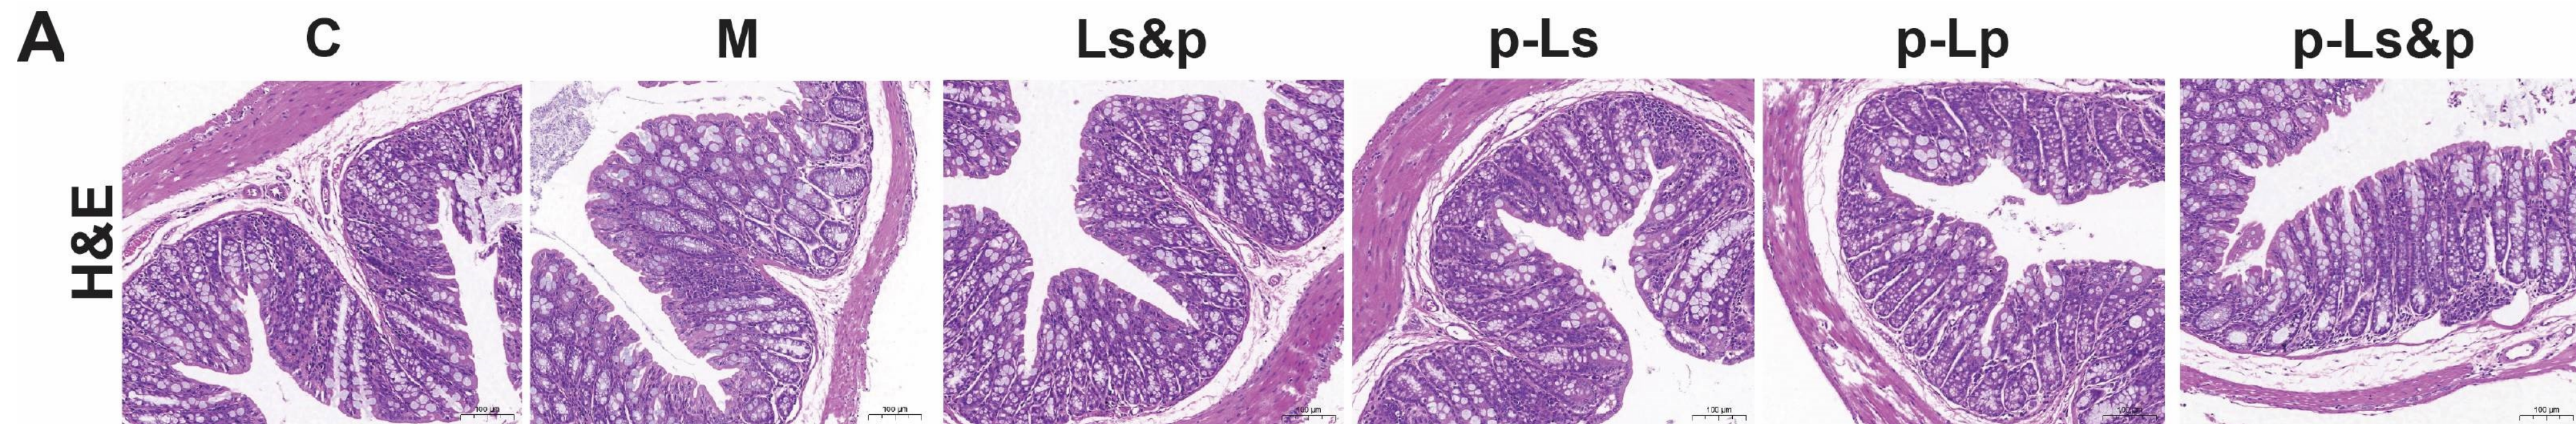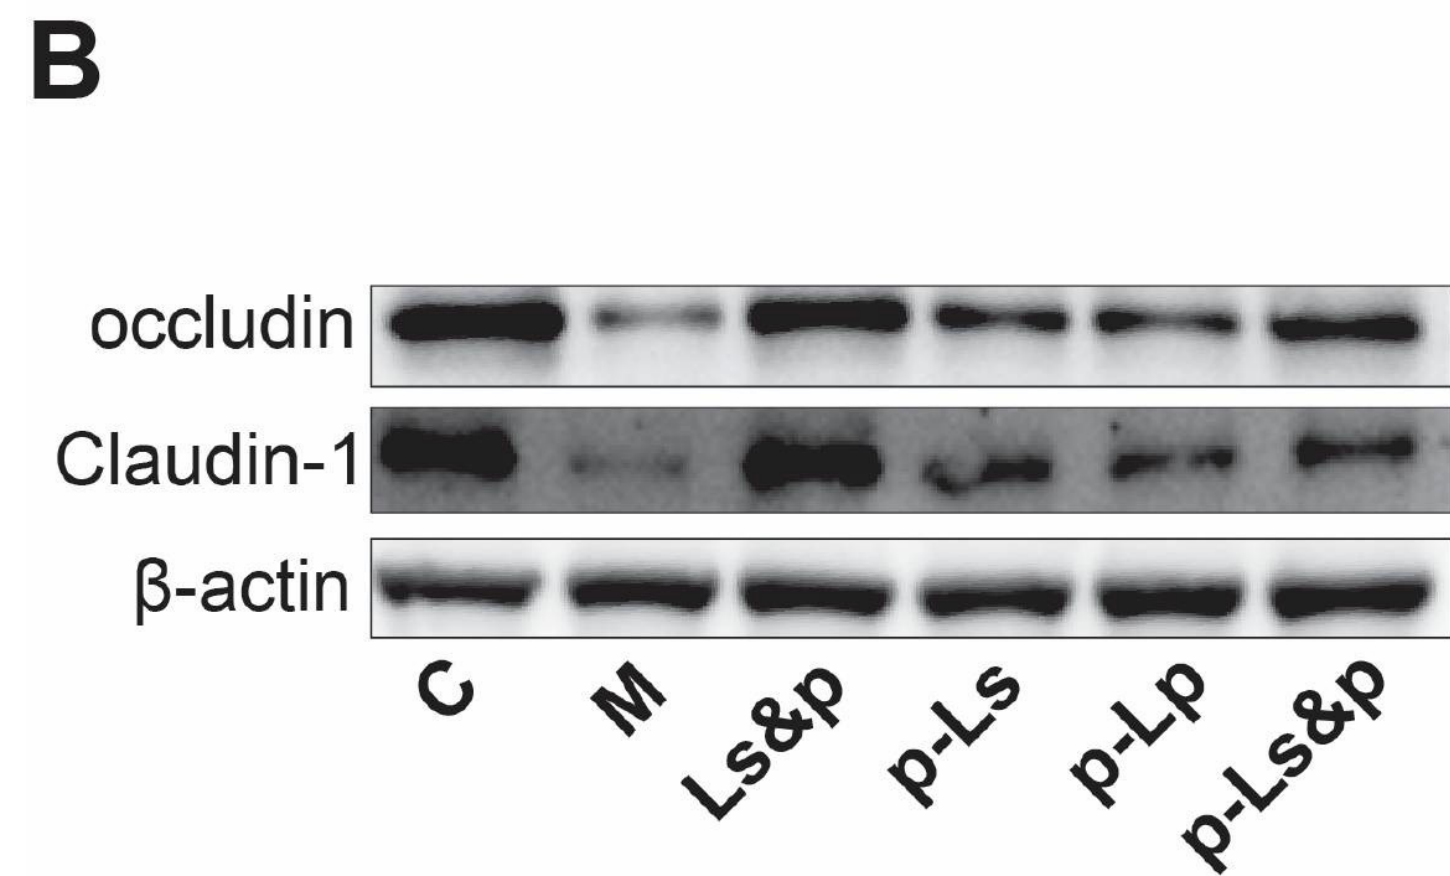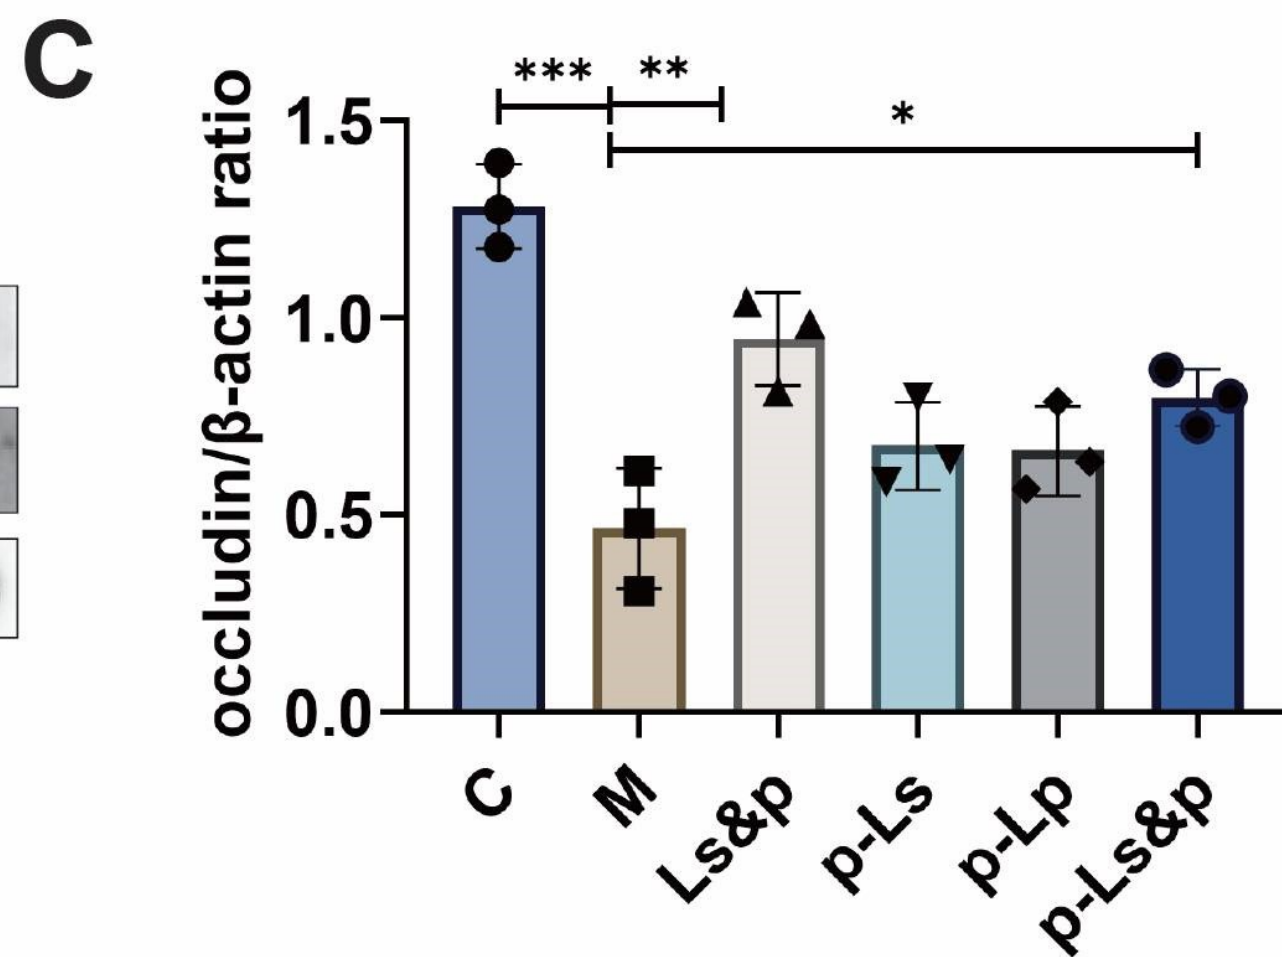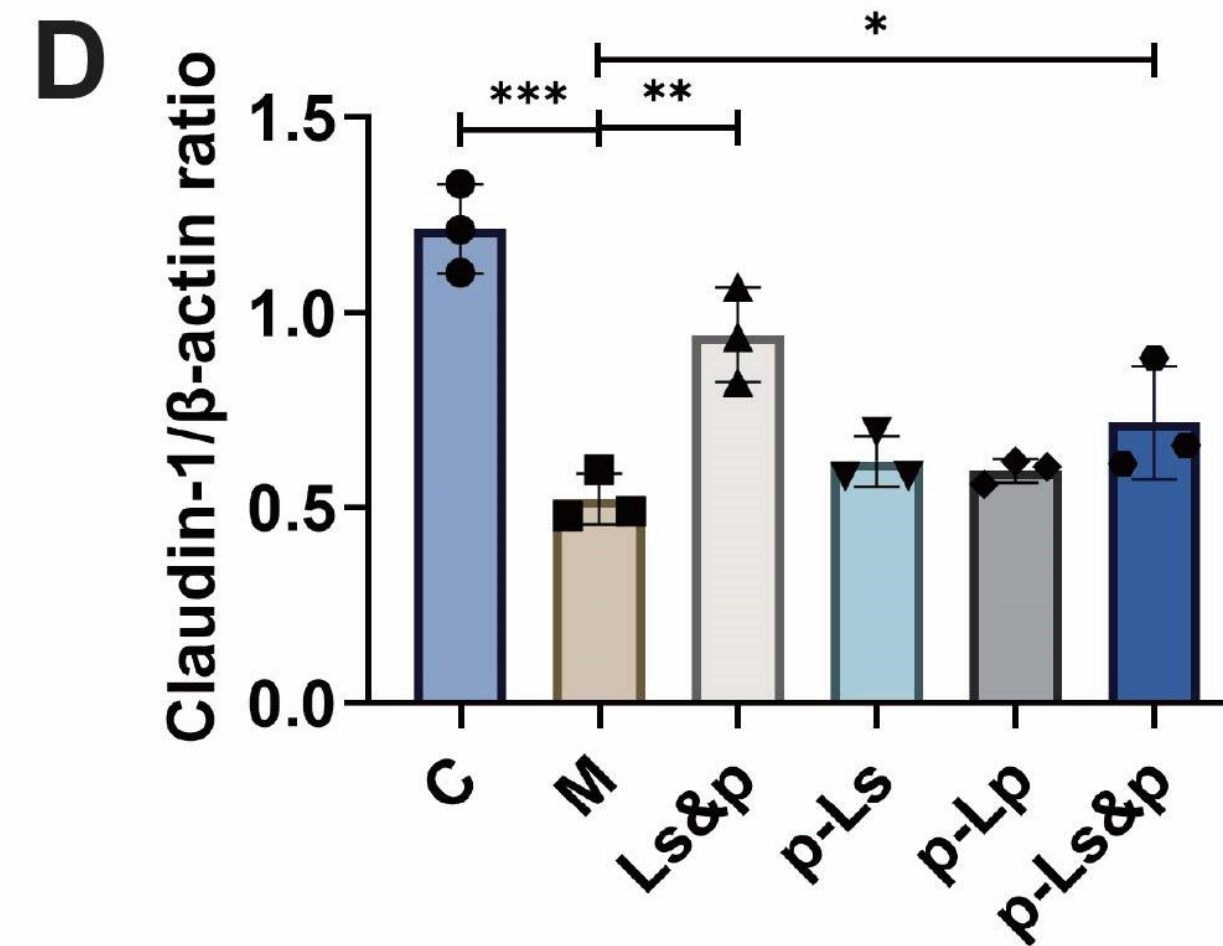

Supplement: d4fo03083d4.pdf [file d4fo03083d4.pdf]
